# Supplementary material
Source: PubMed Central journal article supplement (PMC5514993)

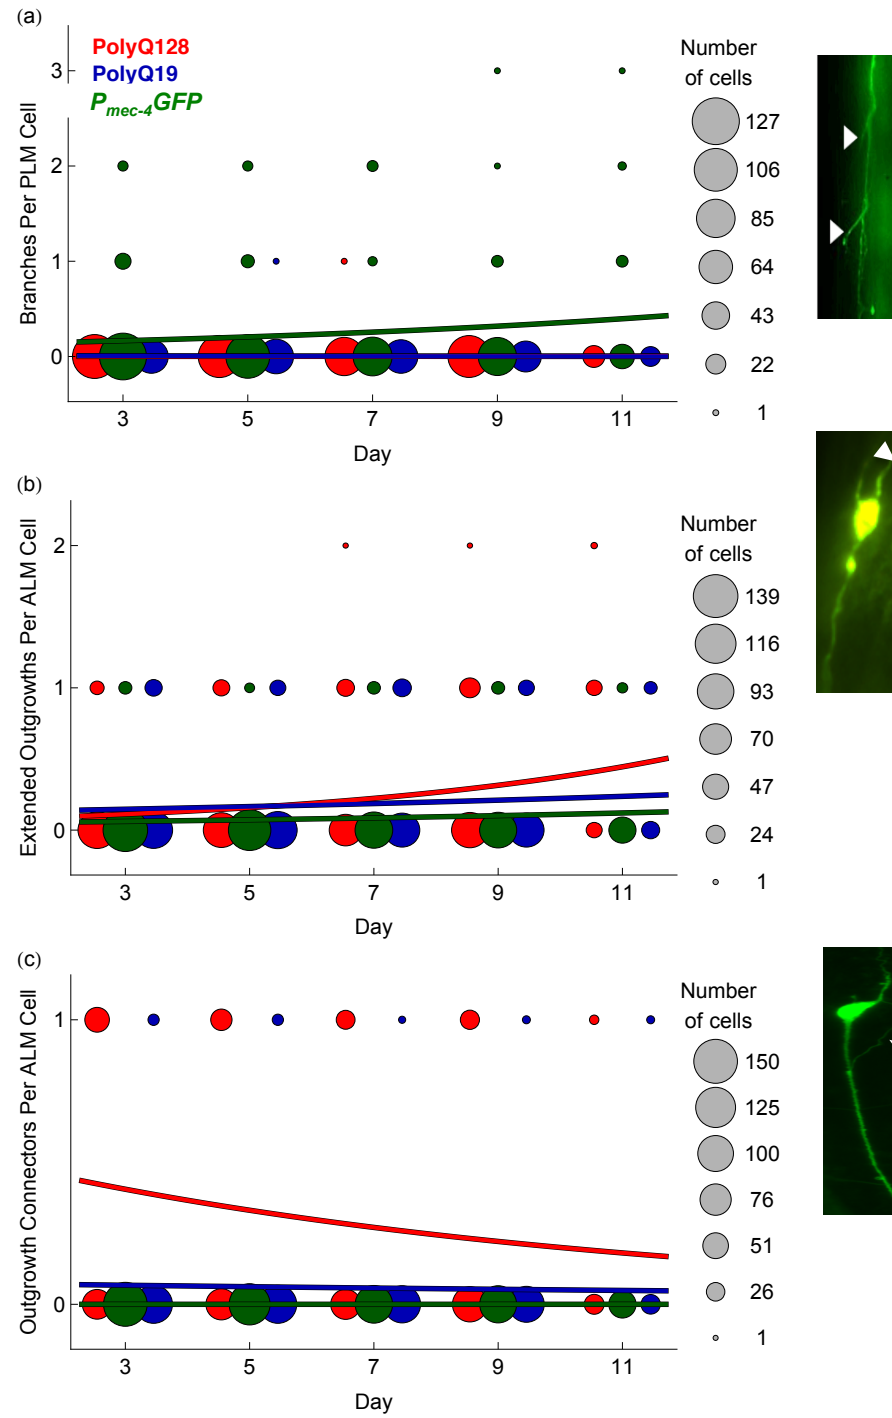

Supplement: npjamd20161-s3.pdf [file npjamd20161-s3.pdf]
